# Supplementary material for: Use of Maternal-Fetal Medicine Subspecialist Services by Commercially Insured Pregnant People
Source: PubMed Central journal article supplement (PMC11731212; doi:10.1001/jamanetworkopen.2024.54565), 2025-01-13
Supplement: jamanetwopen-e2454565-s001.pdf [file jamanetwopen-e2454565-s001.pdf]

# Supplemental Online Content

Sullivan HK, Armstrong JC, Fox K, Cohen JL, Sinaiko AD. Use of maternal-fetal medicine subspecialist services by commercially insured pregnant people. *JAMA Network Open*. 2025;8(1):e2454565. doi:10.1001/jamanetworkopen.2024.54565

**eMethods 1.** Methodology for Identifying Live Births and Stillbirths

**eTable 1.** Sample Creation Table

**eTable 2.** Codes for Classifying MFM Services by Type of Service and Telemedicine

**eTable 3.** ANGELS Risk Measure ICD-10 Codes, Prevalence in Sample, and Rates of MFM Involvement in Care

**eMethods 2.** Individual-Level Characteristics and Driving Distance

**eTable 4.** Expanded Sample Characteristics

**eTable 5.** MFM Services by Pregnancy Risk Status

**eTable 6.** Regression Sensitivity Analyses

**eFigure 1.** Unadjusted Probability of MFM Involvement in Care of At-Risk Pregnancies by Hospital Service Area (HSA)

**eFigure 2.** Adjusted and Unadjusted Probability of MFM Involvement in Care in Full Sample by Hospital Service Area (HSA)

**eTable 7.** Types of Telemedicine Services Provided by MFMs

**eReferences**

This supplemental material has been provided by the authors to give readers additional information about their work.

## **eMethods 1: Methodology for Identifying Live Births and Stillbirths**

We followed the algorithm developed by Ailes et al. (2023) to identify pregnancies in commercial claims data and to categorize the outcomes as live births, live birth and stillbirth in the same pregnancy, stillbirth, spontaneous abortion, elective abortion, or ectopic pregnancy.<sup>1</sup> The Ailes algorithm also estimated gestational age at the end of pregnancy using the latest gestational age diagnosis code available prior to delivery. We adjusted the spacing between pregnancies from 120 days to 30 days, due to pregnancy spacing observed in the data, and in line with other published pregnancy algorithms.<sup>2,3</sup> In the HCCI data, we do not have linked infant data, so we did not check our outcomes against infant data, as Ailes et al. do.

We removed any pregnancy outcomes that were not live births or stillbirths and adjusted the sequencing of pregnancies (e.g., first pregnancy of a person, second pregnancy, etc.) to reflect this. The Ailes et al. algorithm uses the estimated gestational age at delivery to compute a date for the first day of the Last Menstrual Period (LMP) before pregnancy. Finally, we required that all deliveries reach at least 20 weeks of gestation.

**eTable 1: Sample Creation Table**

| <b>Stage of Analysis</b>                                                                        | <b>Unique People in Sample (No.)</b> | <b>Percent Original Sample (%)</b> | <b>Percent Reduction (%)</b> | <b>Pregnancies in Sample (No.)</b> | <b>Percent Original Sample (%)</b> | <b>Percent Reduction (%)</b> |
|-------------------------------------------------------------------------------------------------|--------------------------------------|------------------------------------|------------------------------|------------------------------------|------------------------------------|------------------------------|
| <i>People 18-54 years old with a pregnancy identified by the Ailes et al. (2023) algorithm</i>  | 2,926,008                            | 100%                               | --                           | 3,385,703                          | 100                                | --                           |
| <i>Pregnancies that end in stillbirth or live birth and are 20+ weeks gestation at delivery</i> | 2,620,350                            | 90%                                | 10                           | 2,903,710                          | 86                                 | 14                           |
| <i>Continuous enrollment from estimated Last Menstrual Period to the day of delivery</i>        | 2,017,906                            | 69%                                | 23                           | 2,225,247                          | 66                                 | 23                           |
| <i>Non-missing ZIP code</i>                                                                     | 1,968,774                            | 67%                                | 2                            | 2,169,719                          | 64                                 | 2                            |

NOTES: For the continuous enrollment requirement, we required that people be enrolled in a plan in the HCCI data from the calendar month of the LMP to the calendar month of delivery. Pregnancies could have a gap of 1 month in enrollment (except in the delivery month).

**eTable 2: Codes for Classifying MFM Services by Type of Service and Telemedicine**

|                                            | CPT or HCPCS Code                                                                                                                                                                                 | CPT Code Modifiers | Place of Service Code |
|--------------------------------------------|---------------------------------------------------------------------------------------------------------------------------------------------------------------------------------------------------|--------------------|-----------------------|
| Radiology/Ultrasound <sup>4</sup>          | 76801, 76802, 76805, 76810, 76811, 76812, 76813, 76814, 76815, 76816, 76817                                                                                                                       |                    |                       |
| Antenatal Fetal Surveillance <sup>a4</sup> | 59020, 59025, 76818, 76819, 76820, 76821                                                                                                                                                          |                    |                       |
| Delivery <sup>4</sup>                      | 59400, 59409, 59510, 59514, 59610, 59612, 59618, 59620                                                                                                                                            |                    |                       |
| Evaluation and Management <sup>4</sup>     | 99201-99499                                                                                                                                                                                       |                    |                       |
| Telemedicine Services <sup>b5</sup>        | 98966, 98967, 98968, 98970, 98971, 98972, 99091, 99421, 99422, 99423, 99441, 99442, 99443, 99457, 99458 G0406, G0407, G0408, G0425, G0426, G0427, G0508, G0509, G2010, G2012, G2061, G2062, G2063 | GQ, GT, 95         | 02                    |

<sup>a</sup> Nonstress test, Biophysical Profile, modified Biophysical Profile, or contraction stress test

<sup>b</sup> Some telemedicine services are also E&M services. We identified telemedicine services as either having one of the listed telemedicine-only CPT/HCPCS code or a CPT modifiers or Place of Service code for telemedicine.

**eTable 3: ANGELS Risk Measure ICD-10 Codes, Prevalence in Sample, and Rates of MFM Involvement in Care**

Adapted from Kozhimannil et al. 2016<sup>6</sup>

|                                                          | ICD-10 Diagnosis Codes                                                                                                                                                                                                                                                                                                      | Percent of Sample with Diagnostic Code in a Given Category <sup>c</sup> (%) | Percent of Pregnancies with Condition with MFM Involvement (%) |
|----------------------------------------------------------|-----------------------------------------------------------------------------------------------------------------------------------------------------------------------------------------------------------------------------------------------------------------------------------------------------------------------------|-----------------------------------------------------------------------------|----------------------------------------------------------------|
| <b>Chronic renal disease and other systemic diseases</b> | A40%, A41%, B15%, B16%, B17%, B18%, B19%, C50%, D72.89, D72.9, E00%, E01.8%, E03.0, E03.1, E03.2, E03.3, E03.8, E03.9, E05%, E89.0, K73%, K75.4, K81%, K82%, K85%, K86.0, K86.1, L93%, M32%, N03%, N05%, N06%, N07%, N08%, N17%, N18%, N19, N20%, N25%, N26.1, N26.9, N27%, O12.1%, O26.6%, O26.83%, O90.5, O98.6%, O99.28% | 16.55                                                                       | 55.8                                                           |
| <b>HIV</b>                                               | B20, Z21                                                                                                                                                                                                                                                                                                                    | 0.10                                                                        | 70.12                                                          |
| <b>Herpes</b>                                            | A60%, B0%                                                                                                                                                                                                                                                                                                                   | 4.40                                                                        | 50.81                                                          |
| <b>Syphilis</b>                                          | A50%, A51%, A52%, A53%, O98.1%                                                                                                                                                                                                                                                                                              | 0.13                                                                        | 60.30                                                          |
| <b>Cervical Cancer</b>                                   | C5%, D06%, N87%                                                                                                                                                                                                                                                                                                             | 0.62                                                                        | 51.92                                                          |
| <b>Uterine Abnormalities</b>                             | D25%, D26%, O34.0%, O34.1%, O34.4%, O34.5%, O34.6%, O34.7%, O34.8%, O34.9%                                                                                                                                                                                                                                                  | 10.35                                                                       | 62.78                                                          |
| <b>Diabetes</b>                                          | E10%, E11%, E13%, O24.0%, O24.1%, O24.3%, O24.8%, O24.9%                                                                                                                                                                                                                                                                    | 3.11                                                                        | 70.35                                                          |
| <b>Gestational Diabetes</b>                              | O24.4%                                                                                                                                                                                                                                                                                                                      | 10.82                                                                       | 61.39                                                          |
| <b>Anemia</b>                                            | D50%, O90.81, O99.0%                                                                                                                                                                                                                                                                                                        | 18.01                                                                       | 50.00                                                          |
| <b>Coagulation Disorders</b>                             | D65, D66, D67, D68.0%, D68.1%, D68.2%, D68.3%, D68.4%, D68.8, D68.9                                                                                                                                                                                                                                                         | 0.59                                                                        | 69.16                                                          |
| <b>Hemorrhagic conditions</b>                            | D69%                                                                                                                                                                                                                                                                                                                        | 2.20                                                                        | 55.75                                                          |
| <b>Epilepsy</b>                                          | G40%, R56.9                                                                                                                                                                                                                                                                                                                 | 0.64                                                                        | 59.37                                                          |
| <b>Cardiac Diseases</b>                                  | I0%, I21%, I22%, I24%, I25.1%, I25.3%, I25.4%, I25.5, I25.6, I25.7%, I25.8%, I25.9%, I27%, I28%, I34%, I35.1%, I35.2%, I35.8%, I35.9%, I36.0%, I36.1%, I36.2%, I36.3%, I36.6%, I36.7%, I36.8%, I37%, I38%, I39%, I42%, I43%, I44%, I45%, I46%, I47%, I48%, I49%, I50% I51%, I97.0%, I97.1%, O99.4%, R00.1                   | 3.90                                                                        | 62.29                                                          |
| <b>History of Cranial Injury</b>                         | I60%, I61%, I62%, I63%, I64%, I65%, I66%, I67.1, I67.2, I67.4, I67.5, I67.6, I67.7, I67.81, I67.82                                                                                                                                                                                                                          | 0.14                                                                        | 65.95                                                          |

<sup>c</sup> Percentages do not sum to 100% as a person might have more than one category of condition.

|                                                                                                             |                                                                                                                                                                                                                                                                                                                                                    |       |       |
|-------------------------------------------------------------------------------------------------------------|----------------------------------------------------------------------------------------------------------------------------------------------------------------------------------------------------------------------------------------------------------------------------------------------------------------------------------------------------|-------|-------|
| <b>Pulmonary Diseases</b>                                                                                   | A15%, A17%, A18%, A19%, A22.1, A37.91, A48.1, B25.0, B44.0, B44.81, B44.9, J13%, J14%, J15%, J16%, J17, J18%, J39.8, J43%, J44.9, J47%, J6%, J70%, J80%, J81%, J82%, J84%, J85%, J86%, J90, J91%, J92%, J93%, J94%, J95.0%, J95.1, J95.2, J95.3, J95.811, J95.812, J95.821, J95.822, J85.84, J95.850, J96%, J98%, J99, M34.81, O98.0, R09.1, Z99.1 | 1.30  | 55.78 |
| <b>Placental Bleeding</b>                                                                                   | O44.5%, O45%, O46.0%, O67.0%, O44.1%, O44.3%                                                                                                                                                                                                                                                                                                       | 2.44  | 58.93 |
| <b>Hypertension, Pre-Eclampsia, Eclampsia*</b>                                                              |                                                                                                                                                                                                                                                                                                                                                    | 19.29 | 52.24 |
| Eclampsia                                                                                                   | O15%                                                                                                                                                                                                                                                                                                                                               | 0.17  | 58.24 |
| Essential Hypertension                                                                                      | I10%, I11%, I12%, I13%, I15%, I16%                                                                                                                                                                                                                                                                                                                 | 3.47  | 61.95 |
| Preeclampsia                                                                                                | O10%, O14%                                                                                                                                                                                                                                                                                                                                         | 10.66 | 58.81 |
| Gestational Hypertensive Disorders                                                                          | O11%, O13%, O16%                                                                                                                                                                                                                                                                                                                                   | 14.55 | 53.24 |
| <b>Hyperemesis in Pregnancy</b>                                                                             | O21%                                                                                                                                                                                                                                                                                                                                               | 8.45  | 47.54 |
| <b>Recurrent Pregnancy Loss</b>                                                                             | O26.2%                                                                                                                                                                                                                                                                                                                                             | 1.96  | 63.46 |
| <b>Insufficient Cervix</b>                                                                                  | O34.3%                                                                                                                                                                                                                                                                                                                                             | 1.69  | 69.37 |
| <b>Suspected fetal abnormalities and/or oligohydramnios, polyhydramnios, growth restriction<sup>d</sup></b> |                                                                                                                                                                                                                                                                                                                                                    | 35.56 | 64.01 |
| Known or Suspected Fetal Growth Restriction                                                                 | O36.5%                                                                                                                                                                                                                                                                                                                                             | 12.17 | 54.85 |
| Oligohydramnios                                                                                             | O41.0%                                                                                                                                                                                                                                                                                                                                             | 4.14  | 55.25 |
| Polyhydramnios                                                                                              | O40%                                                                                                                                                                                                                                                                                                                                               | 3.70  | 65.15 |
| Known or Suspected Fetal Abnormalities                                                                      | O35.0%, O35.1%, O35.2%, O35.3%, O35.4%, O35.5%, O35.6%, O35.8%, O35.9%                                                                                                                                                                                                                                                                             | 23.24 | 74.07 |
| <b>Previous Fetal Anomalies</b>                                                                             | Excluded due to lack of ability to observe previous pregnancies                                                                                                                                                                                                                                                                                    | -     | -     |
| <b>Poor Obstetric History</b>                                                                               | O09.21%, O09.29%                                                                                                                                                                                                                                                                                                                                   | 11.10 | 65.62 |

NOTES: In the ICD-10 Diagnosis Code column, the % sign is used to denote that all codes starting with that value were selected (e.g., O35.4% would select O35.41, O35.42, etc.)

<sup>d</sup> Patients may have more than one condition in these subcategories, therefore percents do not sum to 100.

## **eMethods 2: Individual-Level Characteristics and Driving Distance**

### *Geographic Location*

Rural or urban geographic location was determined by the Rural Urban Commuting Area (RUCA) codes for the person's ZIP code. We categorized RUCA codes into 2 standard categories: urban (codes 1.0, 1.1, 2.0, 2.1, 3.0, 4.1, 5.1, 7.1, 8.1, and 10.1), and rural (4.0, 4.2, 5.0, 5.2, 6.0, 6.1, 7.0, 7.2, 7.3, 7.4, 8.0, 8.2, 8.3, 8.4, 9.0, 9.1, 9.2, 10.0, 10.2, 10.3, 10.4, 10.5, and 10.6).<sup>7</sup>

For people with more than one ZIP code during their pregnancy, we assigned them to the ZIP code where the person resided for the plurality of their pregnancy and, for ties, randomly selected one ZIP code.

### *Sociodemographic Characteristics*

For the CDC Social Vulnerability Index (SVI), we cross-walked person ZIP code to county-level SVI measures of socioeconomic status, household composition and disability, minority status and language, and housing and transportation.<sup>8</sup>

As a sensitivity analysis, we proxied a person's race, income, and education with area-level measures associated with the person ZIP code from the 2015-2019 American Community Survey (ACS).<sup>9</sup> We classified all US ZIP codes into quintiles based on the percent of the population without a high-school degree and assigned each delivery to the education quintile of the person's ZIP code. A lower quintile corresponds to a higher percentage of people having a high school degree. We used ACS data to construct Indices of Concentration at the Extremes (ICE) measures of race and income. The ICE measure of race is calculated as the number of non-Hispanic white people in an area minus the number of Non-Hispanic Black people in the area divided by the total of those two groups. A lower quintile in this measure indicates a higher proportion of Black people in the ZIP code.<sup>10</sup> The ICE measure of income is calculated as the difference in the number of high-income people and low-income people in an area divided by the total number of people in the area with reported income; a higher quintile indicates a wealthier ZIP code.

### *Driving Distance*

To calculate driving distance, we first obtained the address of the business practice location of an MFM as recorded in the NPPE database in 2021 (the final year of our study period). For each pregnancy, we determined if a person lived  $\leq 20$  miles, 21-60 miles, or 60+ miles from an MFM by calculating if the centroid<sup>11</sup> of the person's ZIP code was contained within the 20- or 60-mile driving distances of an MFM.<sup>12,13</sup> We selected the 20-mile driving distance because it is the median distance that rural residents drive to obstetric hospital units.<sup>14</sup> Sixty miles is the threshold many state Medicaid programs use as the maximum distance acceptable for beneficiaries to drive to a specialist.<sup>15</sup> Although it would be ideal to use a continuous measure of driving distance, we selected these discrete thresholds to make the calculations computationally feasible.

**eTable 4: Expanded Sample Characteristics**

| <b>Characteristic</b>                            | <b>Overall,<br/>N = 2,169,026 (100)<br/>No., (%)</b> | <b>Not At-Risk<br/>Pregnancies,<br/>N = 543,789 (25.1)<br/>No., (%)</b> | <b>At-Risk Pregnancies,<br/>N = 1,625,237 (74.9)<br/>No., (%)</b> |
|--------------------------------------------------|------------------------------------------------------|-------------------------------------------------------------------------|-------------------------------------------------------------------|
| <b>Sex</b>                                       |                                                      |                                                                         |                                                                   |
| F                                                | 2,138,393 (98.59)                                    | 519,898 (95.61)                                                         | 1,618,495 (99.59)                                                 |
| M                                                | 30,611 (1.41)                                        | 23,883 (4.39)                                                           | 6,728 (0.41)                                                      |
| <b>Delivery Year</b>                             |                                                      |                                                                         |                                                                   |
| 2016                                             | 401,478 (18.51)                                      | 118,762 (21.84)                                                         | 282,716 (17.40)                                                   |
| 2017                                             | 392,854 (18.11)                                      | 103,939 (19.11)                                                         | 288,915 (17.78)                                                   |
| 2018                                             | 367,548 (16.95)                                      | 91,941 (16.91)                                                          | 275,607 (16.96)                                                   |
| 2019                                             | 352,920 (16.27)                                      | 83,385 (15.33)                                                          | 269,535 (16.58)                                                   |
| 2020                                             | 344,660 (15.89)                                      | 80,026 (14.72)                                                          | 264,634 (16.28)                                                   |
| 2021                                             | 309,544 (14.27)                                      | 65,728 (12.09)                                                          | 243,816 (15.00)                                                   |
| <b>Pregnancy Outcome</b>                         |                                                      |                                                                         |                                                                   |
| Any Stillbirth                                   | 20,563 (0.95)                                        | 4,037 (0.74)                                                            | 16,526 (1.02)                                                     |
| Live Birth                                       | 2,148,441 (99.05)                                    | 539,744 (99.26)                                                         | 1,608,697 (98.98)                                                 |
| <b>Gestational Age at Delivery: Median (IQR)</b> | 39.00 (38.00, 39.00)                                 | 39.00 (39.00, 40.00)                                                    | 39.00 (38.00, 39.00)                                              |
| <b>ACOG Risk Measure<sup>16</sup></b>            |                                                      |                                                                         |                                                                   |
| Low Risk                                         | 659,393 (30.40)                                      | 343,500 (63.17)                                                         | 315,893 (19.44)                                                   |
| High Risk                                        | 1,509,610 (69.60)                                    | 200,280 (36.83)                                                         | 1,309,330 (80.56)                                                 |
| <b>AHRQ Risk Measure<sup>17</sup></b>            |                                                      |                                                                         |                                                                   |
| Not At-Risk                                      | 1,103,838 (50.89)                                    | 450,549 (82.85)                                                         | 653,289 (40.20)                                                   |
| At-Risk                                          | 1,065,188 (49.11)                                    | 93,240 (17.15)                                                          | 971,948 (59.80)                                                   |
| <b>RUCA</b>                                      |                                                      |                                                                         |                                                                   |
| Rural                                            | 244,108 (11.25)                                      | 73,413 (13.50)                                                          | 170,695 (10.50)                                                   |
| Urban                                            | 1,924,870 (88.75)                                    | 470,361 (86.50)                                                         | 1,454,509 (89.50)                                                 |
| <b>FAR1</b>                                      |                                                      |                                                                         |                                                                   |
| No                                               | 2,118,657 (97.68)                                    | 526,495 (96.82)                                                         | 1,592,162 (97.96)                                                 |
| Yes                                              | 50,369 (2.32)                                        | 17,294 (3.18)                                                           | 33,075 (2.04)                                                     |
| <b>Moved ZIP Codes During Pregnancy</b>          | 142,919 (6.59)                                       | 34,158 (6.28)                                                           | 108,761 (6.69)                                                    |
| <b>Social Vulnerability Index: Median (IQR)</b>  | 0.59 (0.34, 0.79)                                    | 0.58 (0.33, 0.79)                                                       | 0.59 (0.34, 0.79)                                                 |
| <b>Education Quintile</b>                        |                                                      |                                                                         |                                                                   |
| 1                                                | 485,010 (22.36)                                      | 121,535 (22.35)                                                         | 363,475 (22.36)                                                   |
| 2                                                | 556,801 (25.67)                                      | 141,630 (26.05)                                                         | 415,171 (25.55)                                                   |
| 3                                                | 459,431 (21.18)                                      | 115,763 (21.29)                                                         | 343,668 (21.15)                                                   |
| 4                                                | 393,736 (18.15)                                      | 97,072 (17.85)                                                          | 296,664 (18.25)                                                   |
| 5                                                | 274,026 (12.63)                                      | 67,781 (12.46)                                                          | 206,245 (12.69)                                                   |
| <b>ICE Income Quintile</b>                       |                                                      |                                                                         |                                                                   |
| 1                                                | 121,391 (5.60)                                       | 28,486 (5.24)                                                           | 92,905 (5.72)                                                     |
| 2                                                | 363,074 (16.74)                                      | 95,522 (17.57)                                                          | 267,552 (16.46)                                                   |
| 3                                                | 477,765 (22.03)                                      | 126,247 (23.22)                                                         | 351,518 (21.63)                                                   |
| 4                                                | 596,457 (27.50)                                      | 150,717 (27.72)                                                         | 445,740 (27.43)                                                   |
| 5                                                | 610,291 (28.14)                                      | 142,800 (26.26)                                                         | 467,491 (28.77)                                                   |
| <b>ICE Race Quintile</b>                         |                                                      |                                                                         |                                                                   |
| 1                                                | 216,248 (9.97)                                       | 44,750 (8.23)                                                           | 171,498 (10.55)                                                   |



|   |                 |                 |                 |
|---|-----------------|-----------------|-----------------|
| 2 | 489,252 (22.56) | 115,145 (21.17) | 374,107 (23.02) |
| 3 | 603,749 (27.84) | 151,962 (27.95) | 451,787 (27.80) |
| 4 | 536,472 (24.73) | 142,067 (26.13) | 394,405 (24.27) |
| 5 | 323,283 (14.90) | 89,857 (16.52)  | 233,426 (14.36) |

NOTES: Gestational age at delivery is estimated as per eMethods 1. Rural or urban location was determined by the Rural Urban Commuting Area (RUCA) for the person's ZIP code. We categorized RUCA codes into 2 standard categories: urban (codes 1.0, 1.1, 2.0, 2.1, 3.0, 4.1, 5.1, 7.1, 8.1, and 10.1), and rural (4.0, 4.2, 5.0, 5.2, 6.0, 6.1, 7.0, 7.2, 7.3, 7.4, 8.0, 8.2, 8.3, 8.4, 9.0, 9.1, 9.2, 10.0, 10.2, 10.3, 10.4, 10.5, and 10.6).<sup>7</sup> ICE Income and Race Quintiles refer to Index of Concentration at the Extremes (ICE) measures as described in eMethods 2. The FAR1 measure describes "areas up to 50,000 people that are 60 minutes or more from an urban area of 50,000 or more people."<sup>18</sup>

**eTable 5: MFM Services by Pregnancy Risk Status**

|                                                                  | <b>Overall,</b><br>N=971,377 (100)<br>No., (%) | <b>Not At-Risk<br/>Pregnancies,</b><br>N=146,465 (15.1)<br>No., (%) | <b>At-Risk Pregnancies,</b><br>N=824,912 (84.9)<br>No., (%) |
|------------------------------------------------------------------|------------------------------------------------|---------------------------------------------------------------------|-------------------------------------------------------------|
| <b>Any MFM ultrasound</b>                                        |                                                |                                                                     |                                                             |
| No                                                               | 40,043 (4.1)                                   | 4,832 (3.6)                                                         | 35,211 (4.2)                                                |
| Yes                                                              | 931,334 (96.4)                                 | 128,052 (96.4)                                                      | 803,282 (95.8)                                              |
| <b>Any MFM evaluation<br/>and management<br/>(E&amp;M) visit</b> |                                                |                                                                     |                                                             |
| No                                                               | 491,652 (50.6)                                 | 97,558 (73.4)                                                       | 394,163 (47.0)                                              |
| Yes                                                              | 479,725 (49.4)                                 | 35,326 (26.6)                                                       | 444,330 (53.0)                                              |
| <b>Any MFM antenatal<br/>fetal surveillance</b>                  |                                                |                                                                     |                                                             |
| No                                                               | 575,502 (59.2)                                 | 106,632 (80.2)                                                      | 468,870 (55.9)                                              |
| Yes                                                              | 395,875 (40.8)                                 | 26,252 (19.8)                                                       | 369,623 (44.1)                                              |
| <b>Any MFM delivery</b>                                          |                                                |                                                                     |                                                             |
| No                                                               | 936,310 (96.4)                                 | 129,995 (97.8)                                                      | 806,315 (96.2)                                              |
| Yes                                                              | 35,067 (3.6)                                   | 2,889 (2.2)                                                         | 32,178 (3.8)                                                |
| <b>Any MFM other<br/>service</b>                                 |                                                |                                                                     |                                                             |
| No                                                               | 735,177 (75.7)                                 | 112,674 (84.8)                                                      | 622,503 (74.2)                                              |
| Yes                                                              | 236,200 (24.3)                                 | 20,210 (15.2)                                                       | 215,990 (25.8)                                              |

NOTES: MFM services identified using CPT codes listed in eTable 2. The “other” MFM service codes that were found in the largest number of pregnancies were: CPT 36415, 93325, 81002, 36416, 93976, 96040, 90471, 81003, 90715, 59000. This includes fetal Doppler echocardiograms and duplex scans.

**eTable 6: Regression Sensitivity Analyses**

|                                        | (1)                    | (2)                      | (3)                    | (4)                    | (5)                    |
|----------------------------------------|------------------------|--------------------------|------------------------|------------------------|------------------------|
| <b>ANGELS Risk</b>                     |                        |                          |                        |                        |                        |
| <i>Not At-Risk</i>                     | Ref                    |                          |                        | Ref                    | Ref                    |
| <i>At-Risk</i>                         | 3.15***<br>(2.81,3.53) |                          |                        | 3.15***<br>(2.82,3.52) | 3.14***<br>(2.82,3.51) |
| <b>AHRQ Risk<sup>17</sup></b>          |                        |                          |                        |                        |                        |
| <i>Not At-Risk</i>                     |                        | Ref                      |                        |                        |                        |
| <i>At-Risk</i>                         |                        | 2.00 ***<br>(1.90, 2.12) |                        |                        |                        |
| <b>ACOG Risk<sup>16</sup></b>          |                        |                          |                        |                        |                        |
| <i>Low</i>                             |                        |                          | Ref                    |                        |                        |
| <i>High</i>                            |                        |                          | 2.47***<br>(2.27,2.68) |                        |                        |
| <b>Driving Distance to Nearest MFM</b> |                        |                          |                        |                        |                        |
| <i>&lt;=20 Miles</i>                   | Ref                    | Ref                      | Ref                    |                        | Ref                    |
| <i>21-60 miles</i>                     | 0.75***<br>(0.69,0.82) | 0.75 ***<br>(0.68, 0.82) | 0.75***<br>(0.69,0.82) |                        | 0.68***<br>(0.62,0.75) |
| <i>&gt;60 Miles</i>                    | 0.49***<br>(0.42,0.57) | 0.49 ***<br>(0.42,0.57)  | 0.49***<br>(0.43,0.57) |                        | 0.43***<br>(0.37,0.49) |
| <b>RUCA</b>                            |                        |                          |                        |                        |                        |
| <i>Urban</i>                           |                        |                          |                        | Ref                    |                        |
| <i>Rural</i>                           |                        |                          |                        | 0.78***<br>(0.67,0.90) |                        |
| <b>SVI</b>                             | X                      | X                        | X                      | X                      |                        |
| <b>ICE Quintiles</b>                   |                        |                          |                        |                        | X                      |
| <b>Other Covariates</b>                | X                      | X                        | X                      | X                      | X                      |
| <b>State Fixed Effects</b>             | X                      | X                        | X                      | X                      | X                      |
| Std.Errors                             | by: State              | by: State                | by: State              | by: State              | by: State              |
| Num.Obs.                               | 2163687                | 2163687                  | 2163686                | 2163846                | 2163733                |
| R2                                     | 0.122                  | 0.106                    | 0.112                  | 0.119                  | 0.120                  |

NOTES: Estimates are presented as odds ratios (95% CI) and are the result of logistic regression predicting MFM involvement in care. Variable reference categories are denoted by “ref.” Rural or urban location was determined by the Rural Urban Commuting Area (RUCA) for the person’s ZIP code. We categorized RUCA codes into 2 standard categories: urban (codes 1.0, 1.1, 2.0, 2.1, 3.0, 4.1, 5.1, 7.1, 8.1, and 10.1), and rural (4.0, 4.2, 5.0, 5.2, 6.0, 6.1, 7.0, 7.2, 7.3, 7.4, 8.0, 8.2, 8.3, 8.4, 9.0, 9.1, 9.2, 10.0, 10.2, 10.3, 10.4, 10.5, and 10.6).<sup>7</sup> SVI refers to models in which the four themes of the CDC’s Social Vulnerability Index are included as controls. ICE Quintiles refer to models where Index of Concentration at the Extremes (ICE) measures for race and income were included as controls, as calculated in eMethods 2. Other Covariates included in all models were age at delivery, number of sample pregnancies, and delivery year.

**eFigure 1: Unadjusted Probability of MFM Involvement in Care of At-Risk Pregnancies by Hospital Service Area (HSA)**

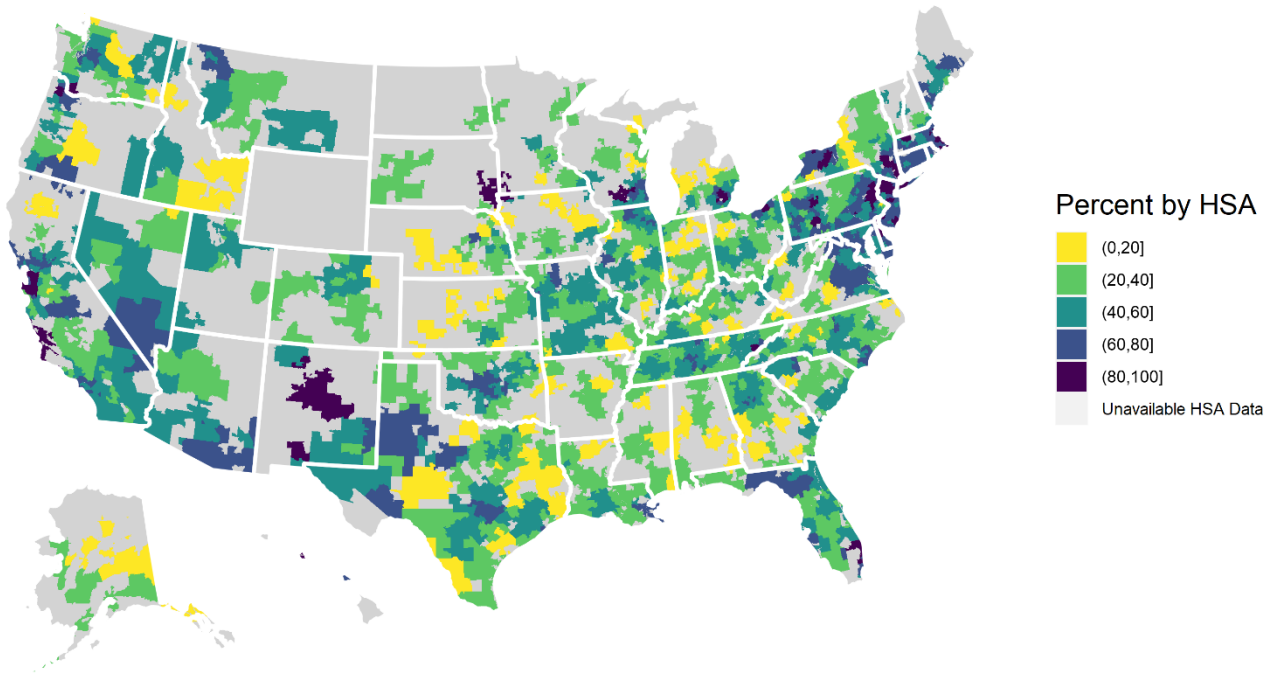

NOTES: This is a map of the United States color coded to show the percent of at-risk pregnancies with MFM service utilization by Hospital Service Area. Map generated from n=1,625,237 pregnancies. HSAs with 10 or fewer pregnancies, or HSAs where there were fewer than 200 MFM claim lines were excluded due to HCCI privacy requirements.

## eFigure 2: Adjusted and Unadjusted Probability of MFM Involvement in Care in Full Sample by Hospital Service Area (HSA)

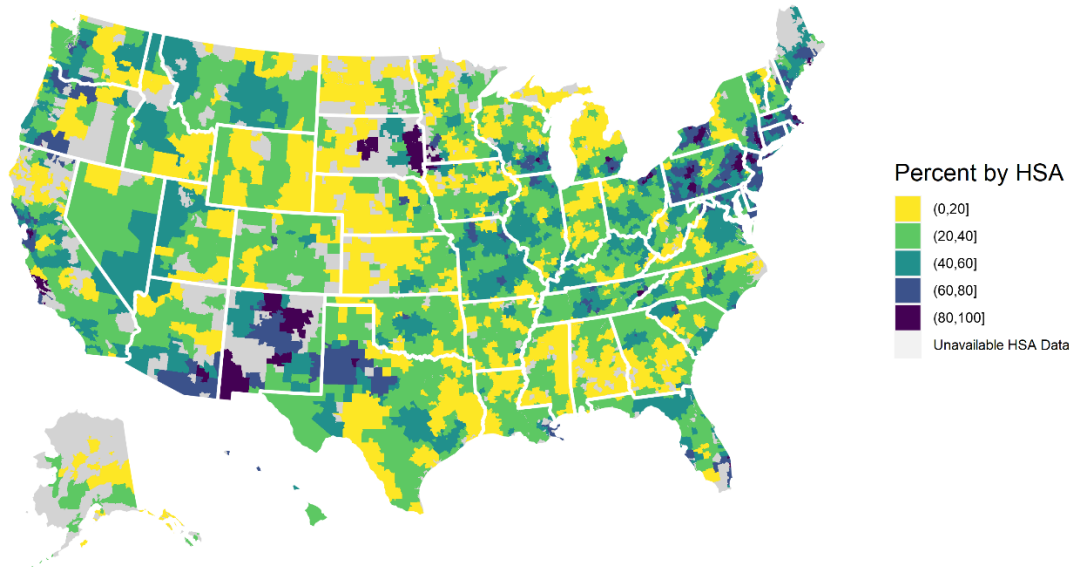

A) Adjusted Probability of MFM Involvement in Care in Full Sample by Hospital Service Area (HSA).

NOTES: This is a map of the United States color coded to show the predicted probability of pregnancies with MFM service utilization by Hospital Service Area. Model estimated on  $n=2,163,687$  pregnancies. Predicted probabilities from a logistic regression adjusted for age, pregnancy risk, driving distance to nearest MFM, delivery year, pregnancy number in sample, and CDC Social Vulnerability Index. Model includes HSA fixed effects, standard errors clustered at the HSA level. HSAs with 10 or fewer pregnancies were excluded due to HCCI privacy requirements.

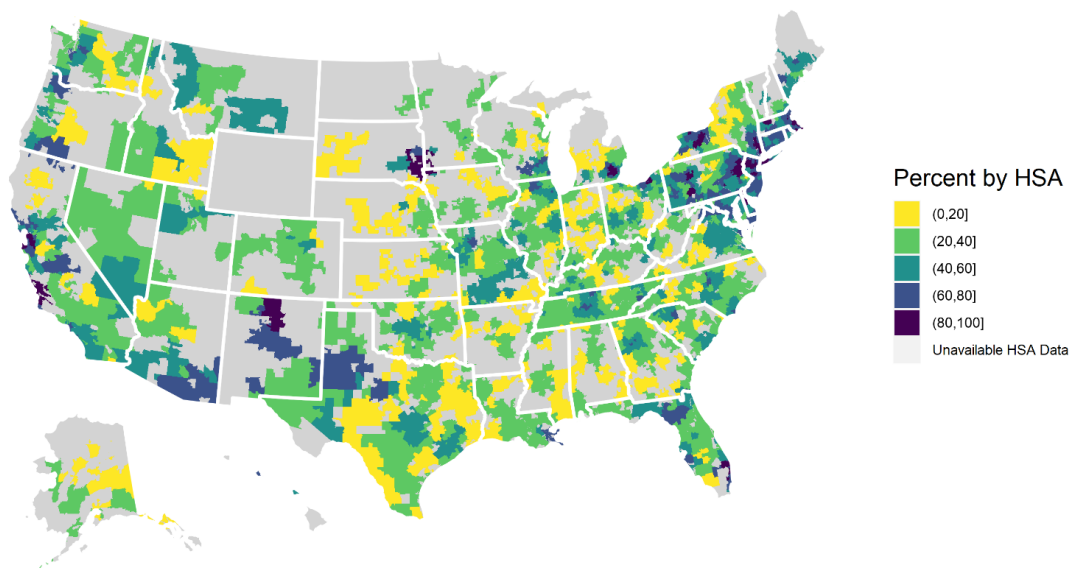

B) Unadjusted Probability of MFM Involvement in Care in Full Sample by Hospital Service Area (HSA).

NOTES: This is a map of the United States color coded to show the percent of pregnancies with MFM service utilization by Hospital Service Area. Map generated from  $n=2,163,687$  pregnancies. HSAs with 10 or fewer pregnancies, or HSAs where there were fewer than 200 MFM claim lines were excluded due to HCCI privacy requirements.

**eTable 7: Types of Telemedicine Services Provided by MFMs**

---

| <b>Characteristic</b>                            | Pregnancies in sample with any telemedicine MFM service,<br>N = 14,852 |
|--------------------------------------------------|------------------------------------------------------------------------|
| Any Ultrasound                                   | 398 (2.7%)                                                             |
| Any Evaluation and Management Visit <sup>e</sup> | 13,415 (90%)                                                           |
| Any Antenatal Fetal Surveillance                 | 134 (0.9%)                                                             |
| Any Other Service                                | 1,649 (11%)                                                            |

---

NOTES: All variables are binary indicators of having a service during pregnancy; as such, numbers will not sum to the total because many pregnancies had more than one telemedicine service. The “other” telemedicine service codes that were found in the largest number of pregnancies were: 96040 (medical genetics and genetic counseling services), 97803 (medical nutrition therapy, follow up), 97802 (medical nutrition therapy, initial visit).

---

<sup>e</sup> See eTable 2 for ICD-10 codes. This category includes both codes for E&M visits and codes for “telemedicine specific” services.

## References

1. Ailes EC, Zhu W, Clark EA, et al. Identification of pregnancies and their outcomes in healthcare claims data, 2008–2019: An algorithm. *PLOS ONE*. 2023;18(4):e0284893. doi:10.1371/journal.pone.0284893
2. Matcho A, Ryan P, Fife D, Gifkins D, Knoll C, Friedman A. Inferring pregnancy episodes and outcomes within a network of observational databases. *PLOS ONE*. 2018;13(2):e0192033. doi:10.1371/journal.pone.0192033
3. MacDonald SC, Cohen JM, Panchaud A, McElrath TF, Huybrechts KF, Hernández-Díaz S. Identifying Pregnancies in Insurance Claims Data: Methods and Application to Retinoid Teratogenic Surveillance. *Pharmacoepidemiol Drug Saf*. 2019;28(9):1211-1221. doi:10.1002/pds.4794
4. American College of Obstetricians and Gynecologists. *OB/GYN Coding Manual: Components of Correct Coding*; 2023.
5. Hussein M, Waters TM, Chang CF, Bailey JE, Brown LM, Solomon DK. Impact of Medicare Part D on Racial Disparities in Adherence to Cardiovascular Medications Among the Elderly. *Med Care Res Rev*. 2016;73(4):410-436. doi:10.1177/1077558715615297
6. Kozhimannil KB, Hung P, Casey MM, Lorch SA. Factors associated with high-risk rural women giving birth in non-NICU hospital settings. *J Perinatol*. 2016;36(7):510-515. doi:10.1038/jp.2016.8
7. Rural Urban Commuting Area Codes Data. Accessed September 12, 2023. <https://depts.washington.edu/uwruca/ruca-uses.php>
8. HUD USPS ZIP Code Crosswalk Files | HUD USER. Accessed February 9, 2024. [https://www.huduser.gov/portal/datasets/usps\\_crosswalk.html](https://www.huduser.gov/portal/datasets/usps_crosswalk.html)
9. Manson S, Schroeder J, Van Riper D, Kugler T, Ruggles S. American Community Survey 2015-2019. Published online 2022. doi:http://doi.org/10.18128/D050.V17.0
10. Krieger N, Waterman PD, Spasojevic J, Li W, Maduro G, Van Wye G. Public Health Monitoring of Privilege and Deprivation With the Index of Concentration at the Extremes. *Am J Public Health*. 2016;106(2):256-263. doi:10.2105/AJPH.2015.302955
11. ZIP Code Distance Database: 2016 Centroid File. NBER. Accessed June 22, 2023. <https://www.nber.org/research/data/zip-code-distance-database>
12. Vilimpoc M. Google Sheets Geocoding Macro. Published online August 3, 2023. Accessed August 14, 2023. <https://github.com/nuket/google-sheets-geocoding-macro>
13. Build apps with HERE Maps API and SDK Platform Access | HERE Developer. Accessed October 14, 2023. <https://developer.here.com>
14. Eberth JM, Hung P, Benavidez GA, et al. The Problem Of The Color Line: Spatial Access To Hospital Services For Minoritized Racial And Ethnic Groups. *Health Affairs*. 2022;41(2):237-246. doi:10.1377/hlthaff.2021.01409
15. Murrin S. State Standards for Access to Care in Medicaid Managed Care. *Office of the Inspector General*. Published online 2014.
16. Indications for Outpatient Antenatal Fetal Surveillance. Accessed October 30, 2023. <https://www.acog.org/clinical/clinical-guidance/committee-opinion/articles/2021/06/indications-for-outpatient-antenatal-fetal-surveillance>

17. Availability of Outpatient Maternal Fetal Medicine and Specialty Care for Women With High Risk Pregnancies | Agency for Healthcare Research and Quality. Accessed October 17, 2024. <https://www.ahrq.gov/pqmp/measures/outpatient-specialty-care.html>
18. U.S. Department of Agriculture, Economic Research Service. Documentation: 2010 Frontier and Remote (FAR) Area Codes. Accessed October 30, 2024. <https://www.ers.usda.gov/data-products/frontier-and-remote-area-codes/documentation/>
