# Supplementary material for: Use of Maternal-Fetal Medicine Subspecialist Services by Commercially Insured Pregnant People
Source: PubMed Central journal article supplement (PMC11731212; doi:10.1001/jamanetworkopen.2024.54565), 2025-01-13
Supplement: jamanetwopen-e2454565-s002.pdf [file jamanetwopen-e2454565-s002.pdf]

## Data Sharing Statement

Sullivan. Use of Maternal-Fetal Medicine Subspecialist Services by Commercially Insured Pregnant People. *JAMA Netw Open*. Published January 13, 2025.

doi:10.1001/jamanetworkopen.2024.54565

### Data

**Data available:** No

### Additional Information

**Explanation for why data not available:** The data was provided by the Health Care Cost Institute. The Data Use Agreement does not allow us to directly share the data due to patient confidentiality.
